# Supplementary material
Source: publisher site journal article supplement (https://www.dovepress.com/article/413313)
Supplement: Supplementary file 1 [file get_supplementary_file.php]

**Supplementary Materials**

Supplementary Results

**Multivariate Cox regression analysis based on the levels of LYMPH count, EO count and EO%**

Taking low-level as a reference, we found that high-level EO count was significantly associated with increased risk of HF even after adjusting for age, male sex, BMI, smoking, diabetes mellitus, past PCI or CABG, SBP, DBP and EF (HR= 2.422, 95% CI: 1.222-4.798, *P*=0.011). There were no significant associations between LYMPH count, EO % and the risk of HF in unadjusted model or adjusted models, based on the

levels of LYMPH count, EO %. (Supplementary Table 1)

Supplementary Table 1 Multivariate Cox regression analysis based on the level of LYMPH count, EO count and EO%

| Variables | Unadjusted | Model 1 | Model 2 |
| --- | --- | --- | --- |
|  | HR (95% CI), *P* value | HR (95% CI), *P* value | HR (95% CI), *P* value |
| LYMPH count |  |  |  |
| Low-level | 1.0 (ref) | 1.0 (ref) | 1.0 (ref) |
| High-level | 1.458 (0.784, 2.710), 0.233 | 1.295 (0.685, 2.448), 0.426 | 0.785 (0.324, 1.898), 0.590 |
| EO count |  |  |  |
| Low-level | 1.0 (ref) | 1.0 (ref) | 1.0 (ref) |
| High-level | 2.412 (1.231, 4.728), **0.010** | 2.422 (1.222, 4.798), **0.011** | 2.034 (0.884, 4.683), 0.095 |
| EO % |  |  |  |
| Low-level | 1.0 (ref) | 1.0 (ref) | 1.0 (ref) |
| High-level | 1.824 (0.956, 3.480), 0.068 | 1.880 (0.972, 3.637), 0.061 | 1.508 (0.578, 3.936), 0.401 |

**Model 1:** adjusted for age, male sex, BMI, smoking, DM, past PCI or CABG, SBP, DBP and LVEF.
**Model 2:** further adjusted for RBC count, MCV, WBC count, NEUT count, LYMPH %, MONO %, NT-proBNP, blood glucose and D-Dimer.

**Abbreviations:** LYMPH: Lymphocyte; EO: Eosinophilic granulocyte; HR: hazard ratio; CI: confidence interval; ref: reference group; PLT: Platelet; LYMPH: Lymphocyte; EO: Eosinophilic granulocyte; HR: hazard ratio; CI: confidence interval; BMI: body mass index; DM: Diabetes Mellitus; PCI: percutaneous coronary intervention; CABG: coronary artery bypass grafting; SBP: systolic blood pressure; DBP: diastolic blood pressure; LVEF: left ventricular ejection fraction; RBC: red blood cell; MCV: mean corpuscular volume; WBC: white blood cell; NEUT: Neutrophilic granulocyte; MONO: Monocyte; NT-proBNP: N-terminal pro-B-type natriuretic peptide.

Bold font denotes *P* < 0.05.
